# Supplementary material for: Peer Support Specialist Work and Experiences During the COVID-19 Pandemic: A National Longitudinal Study
Source: Atypon-hosted journal article supplement (doi:10.1176/appi.ps.202100718), 2022-07-27
Supplement: appi.ps.202100718.ds001.pdf [file appi.ps.202100718.ds001.pdf]

**Supplemental Table 1: Crosstabs/Chi-Square and Paired T-Test Results (N=496)<sup>1</sup>**

|                                                              | Pre-COVID <sup>2</sup> (T1) |      | Survey 1 (T2) |      | X <sup>2</sup> | Survey 2 (T3) |         | X <sup>2</sup> |
|--------------------------------------------------------------|-----------------------------|------|---------------|------|----------------|---------------|---------|----------------|
|                                                              | N                           | %    | N             | %    |                | N             | %       |                |
| <b>Ability to Pay Monthly Bills</b>                          |                             |      |               |      | 179.95**       |               |         | 47.45**        |
| I can typically pay all of my bills in full                  | 370                         | 77.7 | 332           | 69.7 |                | 324           | 68.1    |                |
| I cannot pay some bills/only make partial payments           | 106                         | 22.2 | 144           | 30.3 |                | 152           | 31.9    |                |
| <b>Impact on Personal Finances</b>                           |                             |      |               |      |                |               |         | 138.91**       |
| Hurt my finances MORE than most other people                 | -                           | -    | 33            | 7.3  | -              | 42            | 9.3     |                |
| Hurt my finances LESS than most other people                 | -                           | -    | 306           | 67.5 |                | 264           | 58.3    |                |
| Hurt my finances about the same as most others               | -                           | -    | 114           | 25.2 |                | 147           | 32.5    |                |
| <b>Challenges Experienced by Peer Specialist<sup>3</sup></b> |                             |      |               |      |                |               |         |                |
| Possibility of Job Loss                                      | -                           | -    | 101           | 29.8 | -              | 84            | 24.8    | 51.04**        |
| Isolation                                                    | -                           | -    | 259           | 76.4 | -              | 251           | 74.0    | 38.38**        |
| Communication Challenges                                     | -                           | -    | 241           | 71.1 | -              | 227           | 67.0    | 27.59**        |
| Lack of Training for New Situation/Work Tasks                | -                           | -    | 95            | 28.0 | -              | 85            | 25.1    | 38.30**        |
| Lack of Protective Equipment                                 | -                           | -    | 63            | 18.6 | -              | 53            | 15.6    | 54.21**        |
| Lack of Other Equipment                                      | -                           | -    | 39            | 11.5 | -              | 50            | 14.7    | 24.20**        |
| Other                                                        | -                           | -    | 59            | 17.4 | -              | 51            | 15.0    | 2.73           |
|                                                              | Pre-COVID <sup>2</sup> (T1) |      | Survey 1 (T2) |      | t              | Survey 2 (T3) |         | t              |
|                                                              | M±SD                        |      | M±SD          |      |                | M±SD          |         |                |
| <b>Work Task Engagement<sup>4</sup></b>                      |                             |      |               |      |                |               |         |                |
| Individual Support                                           | 4.12±1.09)                  |      | 3.30±1.43     |      | 11.06**        | -             | -       |                |
|                                                              | -                           |      | 3.30±1.43     |      | -              | 3.68±1.15     | -4.90** |                |
| Clerical/Administrative Tasks                                | 4.12±1.09                   |      | -             |      | -              | 3.68±1.15     | 6.20**  |                |
|                                                              | 3.72±1.21                   |      | 3.67±1.23     |      | 1.12           | -             | -       |                |
| Group Facilitations                                          | -                           |      | 3.67±1.23     |      | -              | 3.60±1.11     | 1.07    |                |
|                                                              | 3.72±1.21                   |      | -             |      | -              | 3.60±1.11     | 1.92    |                |
| Systems Advocacy                                             | 3.12±1.43                   |      | 2.37±1.48     |      | 10.30**        | -             | -       |                |
|                                                              | -                           |      | 2.37±1.48     |      | -              | 2.68±1.34     | -4.34** |                |
|                                                              | 3.12±1.43                   |      | -             |      | -              | 2.68±1.34     | 5.95**  |                |
|                                                              | 2.98±1.34                   |      | 2.66±1.38     |      | 5.60**         | -             | -       |                |
|                                                              | -                           |      | 2.66±1.38     |      | -              | 2.75±1.22     | -1.26   |                |
|                                                              | 2.98±1.34                   |      | -             |      | -              | 2.75±1.22     | 3.13*   |                |

|                                       |           |           |        |           |       |
|---------------------------------------|-----------|-----------|--------|-----------|-------|
|                                       | 2.99±1.21 | 2.68±1.31 | 5.32** | -         | -     |
| Training                              | -         | 2.68±1.31 | -      | 2.81±1.08 | -1.82 |
|                                       | 2.99±1.21 | -         | -      | 2.81±1.08 | 2.69* |
| <b>Support Satisfaction by Origin</b> |           |           |        |           |       |
| Organization                          | -         | 2.14±1.26 | -      | 2.13±1.21 | 0.39  |
| Supervisor                            | -         | 1.94±1.25 | -      | 1.97±1.23 | -0.45 |
| Coworkers                             | -         | 1.86±1.09 | -      | 1.85±1.03 | 0.12  |
| <b>Support Satisfaction by Type</b>   |           |           |        |           |       |
| Social/Emotional                      | -         | 2.16±1.17 | -      | 2.19±1.10 | 0.88  |
| Training/Educational                  | -         | 2.26±1.21 | -      | 2.19±1.11 | 0.18  |
| Material                              | -         | 2.15±1.17 | -      | 2.12±1.16 | 0.16  |

\*p<0.01, \*\*p<0.001.

<sup>1</sup>Some respondents did not complete all items, and percentages are based on the total number of responses received for each item.

<sup>2</sup>Assessed at Survey 1.

<sup>3</sup>Survey respondents were allowed to select more than one option, categories are not mutually exclusive.

<sup>4</sup>Response scale for job tasks conducted: 5, all of the time; 4, most of the time; 3, some of the time; 2, a little of the time; 1, none of the time.
